# Supplementary material
Source: PubMed Central journal article supplement (PMC3517183)
Supplement: NIHMS421438-supplement-supplement.pdf [file NIHMS421438-supplement-supplement.pdf]

## Supplemental Legends

Fig. S1. Gating strategy used to delineate immune cell subpopulations within PBMCs. The dendrogram shows the gating hierarchy for the 12 cell subpopulations with the seven distinct immune cell subpopulations outlined in red.

Fig. S2. Differential activation of cell subpopulations. *A*,  $\text{IFN}\gamma \rightarrow \text{pStat1}$  responses in the seven distinct cell subpopulations for all 60 donors. *B*,  $\text{IL2} \rightarrow \text{pStat5}$  responses in the seven distinct cell subpopulations for all 60 donors.

Fig S3. Healthy immune signaling network map with responsive nodes only. A heatmap representing the magnitude of the Pearson correlation coefficients between pairs of nodes both within and between all seven distinct cell subpopulations. Signaling nodes that did not show a response (Fold values greater than 0.25, see Fig. 1) are excluded from the figure. Increasing positive correlations are shown by increasing green intensity and increasing negative correlations by increasing purple intensity.

Table S1. Thirty-eight signaling nodes measured in the study. All signaling nodes were measured in each immune cell subpopulation.

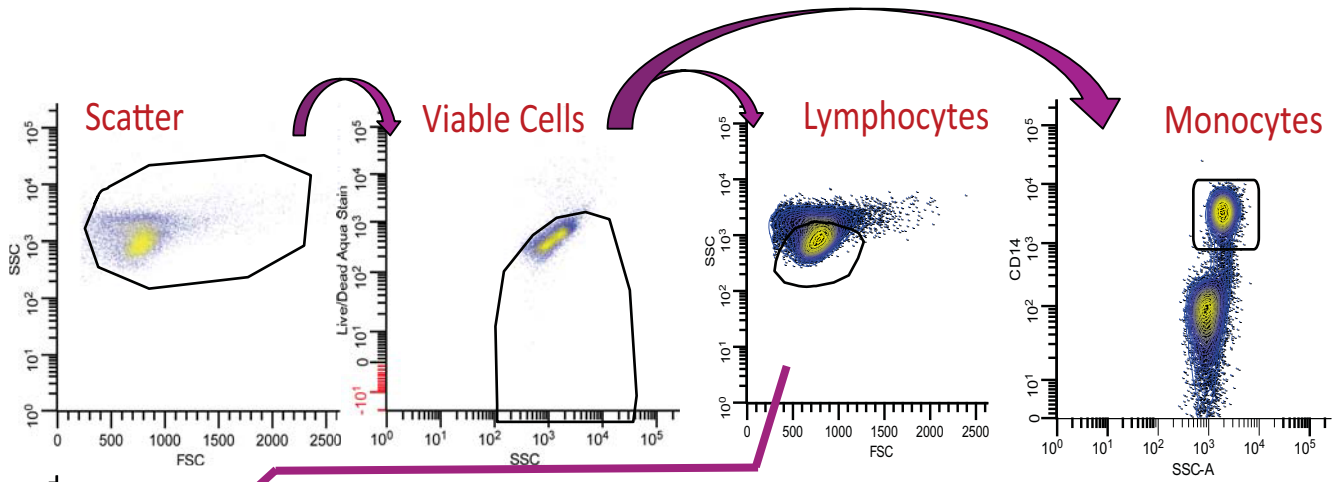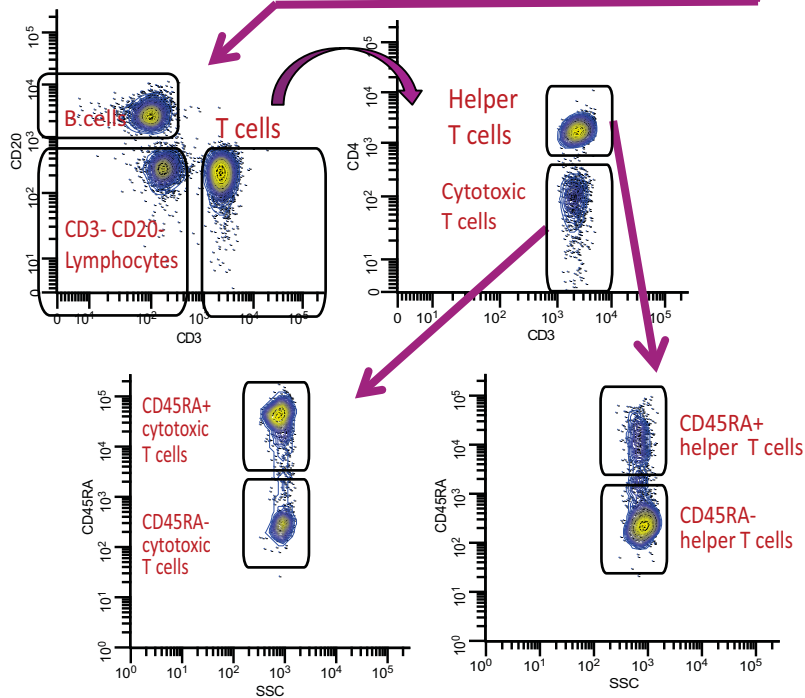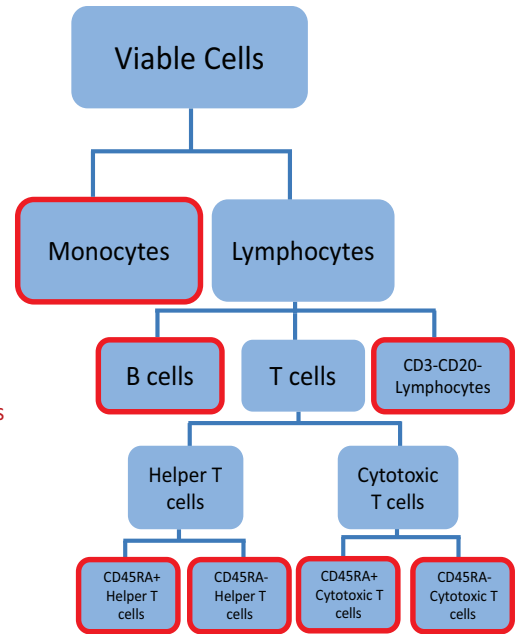

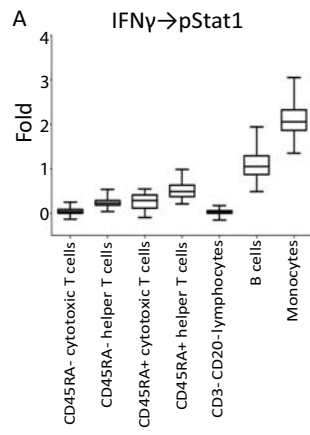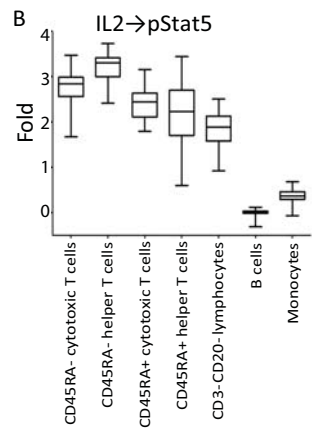

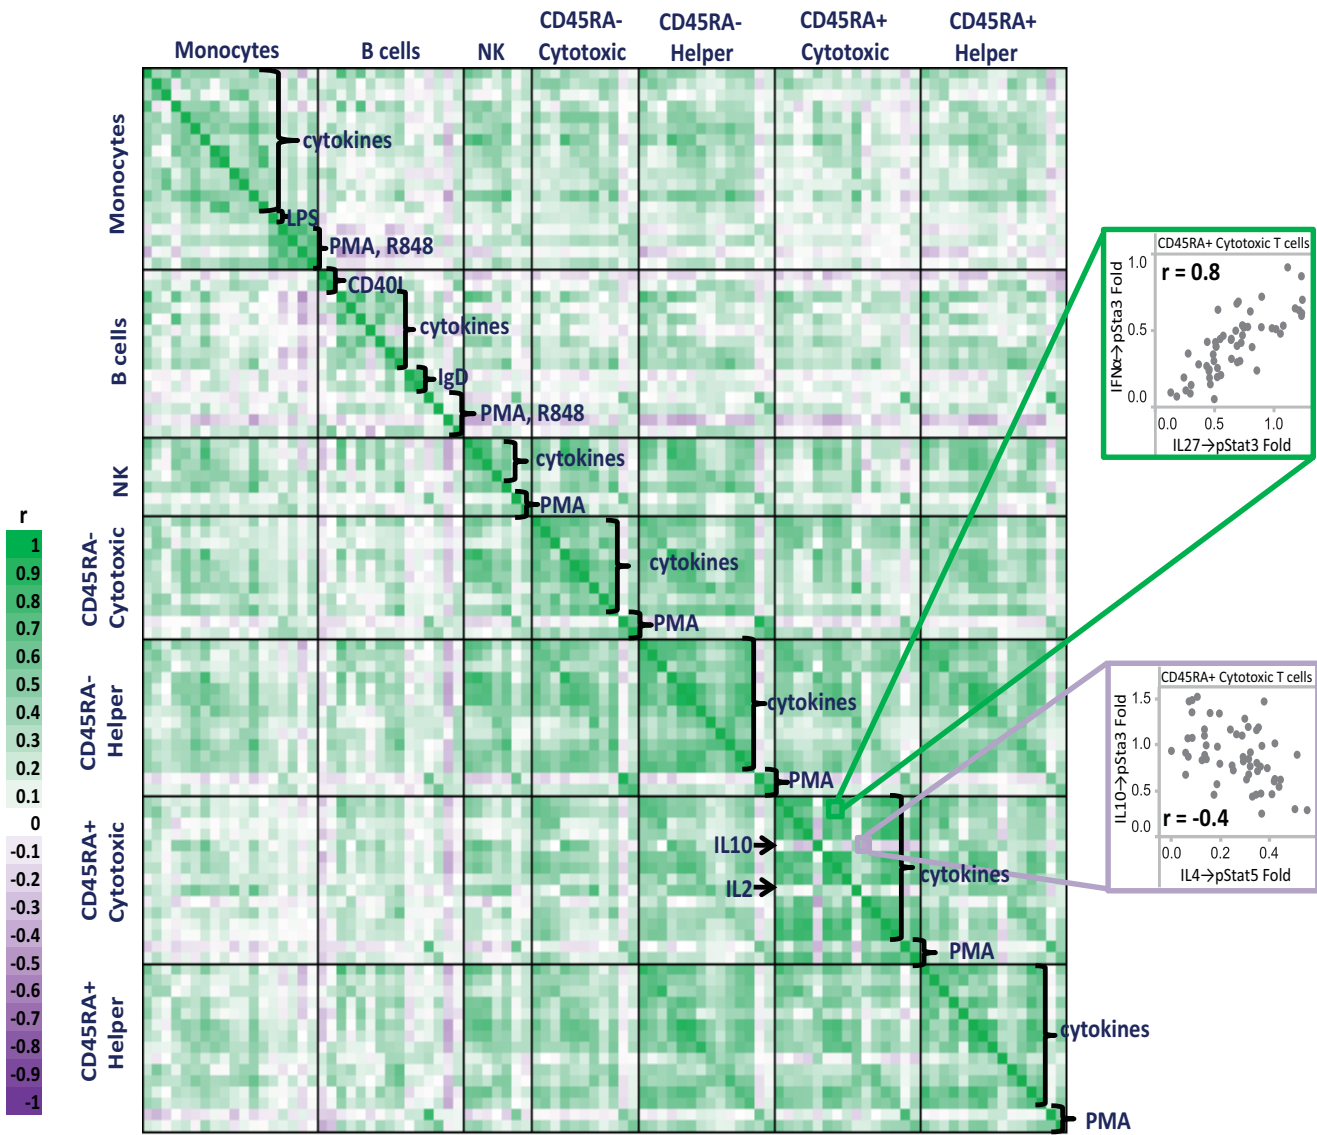

Table S1. Thirty-eight signaling nodes measured in the study. All signaling nodes were measured in each immune cell subpopulation.

|    | Signaling Node                           |
|----|------------------------------------------|
| 1  | IFN $\alpha$ $\rightarrow$ pStat1        |
| 2  | IFN $\alpha$ $\rightarrow$ pStat3        |
| 3  | IFN $\alpha$ $\rightarrow$ pStat5        |
| 4  | IFN $\alpha$ $\rightarrow$ pStat6        |
| 5  | IFN $\gamma$ $\rightarrow$ pStat1        |
| 6  | IFN $\gamma$ $\rightarrow$ pStat3        |
| 7  | IFN $\gamma$ $\rightarrow$ pStat5        |
| 8  | IFN $\gamma$ $\rightarrow$ pStat6        |
| 9  | IL2 $\rightarrow$ pStat5                 |
| 10 | IL2 $\rightarrow$ pStat6                 |
| 11 | IL4 $\rightarrow$ pStat5                 |
| 12 | IL4 $\rightarrow$ pStat6                 |
| 13 | IL6 $\rightarrow$ pStat1                 |
| 14 | IL6 $\rightarrow$ pStat3                 |
| 15 | IL10 $\rightarrow$ pStat1                |
| 16 | IL10 $\rightarrow$ pStat3                |
| 17 | IL27 $\rightarrow$ pStat1                |
| 18 | IL27 $\rightarrow$ pStat3                |
| 19 | IL27 $\rightarrow$ pStat5                |
| 20 | IL27 $\rightarrow$ pStat6                |
| 21 | $\alpha$ -IgD/LPS $\rightarrow$ pS6      |
| 22 | $\alpha$ -IgD/LPS $\rightarrow$ pAkt     |
| 23 | R848 $\rightarrow$ pErk                  |
| 24 | R848 $\rightarrow$ pNF $\kappa$ B        |
| 25 | CD40L $\rightarrow$ pErk                 |
| 26 | CD40L $\rightarrow$ pNF $\kappa$ B       |
| 27 | PMA $\rightarrow$ pS6                    |
| 28 | PMA $\rightarrow$ pErk                   |
| 29 | Unmodulated $\rightarrow$ pStat1         |
| 30 | Unmodulated $\rightarrow$ pStat3         |
| 31 | Unmodulated $\rightarrow$ pStat5         |
| 32 | Unmodulated $\rightarrow$ pStat6         |
| 33 | Unmodulated $\rightarrow$ pS6            |
| 34 | Unmodulated $\rightarrow$ pAkt           |
| 35 | Unmodulated $\rightarrow$ pErk           |
| 36 | Unmodulated $\rightarrow$ pNF $\kappa$ B |
| 37 | Unmodulated (DMSO) $\rightarrow$ pS6     |
| 38 | Unmodulated (DMSO) $\rightarrow$ pErk    |
